# Supplementary material
Source: publisher figshare collection journal article supplement (https://geolsoc.figshare.com/ndownloader/files/34180051)
Supplement: Supplementary file 1 [file 34180051]

#NEXUS
BEGIN TREES;

	UTREE 1 = (Amphimedon_queenslandica: 7.429770, (Trichoplax_adhaerens: 6.674320, (Acropora_digitifera: 6.498475, ((Ciona_intestinalis: 6.035268, (Danio_rerio: 4.372554, (Mus_musculus: 1.164455, Homo_sapiens: 1.164455) [&95%={0.654877, 1.6455}]: 3.208099) [&95%={4.21473, 4.53651}]: 1.662714) [&95%={5.77086, 6.2134}]: 0.239661, ((Brachionus_sp: 6.036820, ((Crassostrea_gigas: 5.404919, (Lottia_gigantea: 5.019383, Aplysia_californica: 5.019383) [&95%={4.73683, 5.25796}]: 0.385536) [&95%={5.32435, 5.48904}]: 0.458616, (Alvinella_pompejana: 5.319802, (Helobdella_robusta: 4.930965, Capitella_telata: 4.930965) [&95%={3.96204, 5.50582}]: 0.388838) [&95%={4.84843, 5.67656}]: 0.543732) [&95%={5.72243, 6.00778}]: 0.173285) [&95%={5.90509, 6.15949}]: 0.098747, ((Armorloricus_elegans: 5.989339, ((Meiopriapulus_sp: 5.594571, (Priapulus_caudatus: 2.892172, Halicryptus_spinulosus: 2.892172) [&95%={1.18126, 4.22992}]: 2.702398) [&95%={5.08363, 5.86567}]: 0.304630, (Pycnophyes_kielensis: 5.237134, (Echinoderes_sp: 2.980508, Echinoderes_horni: 2.980508) [&95%={1.3339, 4.3015}]: 2.256626) [&95%={4.42469, 5.68704}]: 0.662067) [&95%={5.74843, 6.03963}]: 0.090137) [&95%={5.86109, 6.11185}]: 0.067678, (((Gordius_sp: 4.616567, Nectonema_munidae: 4.616567) [&95%={2.56168, 5.42187}]: 1.004847, ((Xiphinema_index: 4.501057, (Trichuris_muris: 3.099555, Trichinella_spiralis: 3.099555) [&95%={1.44324, 4.28579}]: 1.401503) [&95%={3.25488, 5.11616}]: 0.412646, ((Pristionchus_pacificus: 2.806252, Caenorhabditis_elegans: 2.806252) [&95%={1.31844, 3.87991}]: 0.876968, (Brugia_malayi: 2.898030, Ascaris_sum: 2.898030) [&95%={1.40651, 3.97127}]: 0.785191) [&95%={2.12605, 4.51414}]: 1.230483) [&95%={3.96822, 5.35964}]: 0.707711) [&95%={5.26101, 5.83136}]: 0.373257, (((Actinarctus_doryphorus: 4.785226, (Echiniscus_testudo: 1.765322, Echiniscus_bisetosus: 1.765322) [&95%={0.247374, 3.64241}]: 3.019904) [&95%={2.58788, 5.35992}]: 0.816870, (Milnesium_tardigradum: 5.318255, (Richtersius_coronifer: 4.048761, (Ramazzottius_varieornatus: 3.470744, Hypsibius_dujardini: 3.470744) [&95%={1.33171, 4.88098}]: 0.578017) [&95%={1.79295, 5.06242}]: 1.269493) [&95%={5.28897, 5.39519}]: 0.283841) [&95%={5.50765, 5.71257}]: 0.350034, ((Epiperipatus_sp: 3.838481, (Peripatus_sp: 2.078189, Euperipatoides_kanagrensis: 2.078189) [&95%={0.407218, 4.11305}]: 1.760292) [&95%={1.71973, 5.30314}]: 2.031677, (((Pycnogonum_sp: 4.595645, Anoplodactylus_eroticus: 4.595645) [&95%={4.31035, 5.0409}]: 0.977343, (Limulus_polyphemus: 5.168133, ((Siro_boyerae: 4.614659, Ixodes_scapularis: 4.614659) [&95%={4.05805, 5.03159}]: 0.320636, (Chaerilus_celebensis: 4.640734, (Acanthoscurria_gomesiana: 3.516168, Neoscona_arabesca: 3.516168) [&95%={3.01831, 4.32316}]: 1.124566) [&95%={4.36856, 5.01602}]: 0.294561) [&95%={4.70763, 5.21322}]: 0.232838) [&95%={5.01576, 5.3827}]: 0.404855) [&95%={5.43485, 5.72035}]: 0.129355, (((Scutigera_coleoptrata: 4.928775, (Strigamia_maritima: 4.128776, Lithobius_fortificatus: 4.128776) [&95%={3.83698, 4.68307}]: 0.799999) [&95%={4.54943, 5.25159}]: 0.440299, ((Prostemmiulus_sp: 3.924785, Polydesmus_angustus: 3.924785) [&95%={2.61394, 4.86624}]: 1.036128, (Polyxenus_lagurus: 4.680349, Glomeridesmus_sp: 4.680349) [&95%={3.86904, 5.17683}]: 0.280564) [&95%={4.41571, 5.30942}]: 0.408160) [&95%={5.13729, 5.56341}]: 0.260838, ((Meganyctiphanes_norvegica: 3.587981, (Petrolisthes_cinctipes: 2.898088, Litopenaeus_vannamaei: 2.898088) [&95%={1.47313, 3.96564}]: 0.689893) [&95%={2.24125, 4.4368}]: 1.741050, ((Tigriopus_japonicus: 3.532313, Eurytemora_affinis: 3.532313) [&95%={1.98041, 4.49122}]: 1.689702, ((Artemia_francisca: 4.425403, (Daphnia_magna: 1.607893, Daphnia_pulex: 1.607893) [&95%={0.2741, 3.33537}]: 2.817510) [&95%={4.0727, 4.8369}]: 0.709904, (Xibalbanus_tumulensis: 5.056333, (Folsomia_candida: 4.905887, (Meinertellus_cundinamarcensis: 4.621044, ((Ephemera_danica: 3.984443, Calopteryx_splendens: 3.984443) [&95%={3.4798, 4.31959}]: 0.306656, ((Tetrix_subulata: 3.647027, (Peruphasma_schultei: 3.334866, (Periplaneta_americana: 2.498341, Mantis_religiosa: 2.498341) [&95%={1.58575, 3.25638}]: 0.836525) [&95%={2.87648, 3.74745}]: 0.312161) [&95%={3.31652, 3.96}]: 0.376671, (Cercopis_vulnerata: 3.878821, ((Gynaikothrips_ficorum: 3.292843, Nasonia_sp: 3.292843) [&95%={2.88957, 3.59415}]: 0.375622, ((Platycentropus_radiatus: 2.580740, Parides_euridedes: 2.580740) [&95%={2.07415, 3.03006}]: 0.828066, (Tribolium_castaneum: 3.150649, Eurelon_nostras: 3.150649) [&95%={3.07117, 3.3471}]: 0.258157) [&95%={3.25515, 3.61899}]: 0.259658) [&95%={3.45884, 3.89334}]: 0.210357) [&95%={3.63783, 4.10416}]: 0.144877) [&95%={3.763, 4.26555}]: 0.267401) [&95%={4.00753, 4.56063}]: 0.329945) [&95%={4.33948, 4.88396}]: 0.284842) [&95%={4.66368, 5.14082}]: 0.150446) [&95%={4.84159, 5.27067}]: 0.078974) [&95%={4.93582, 5.33819}]: 0.086708) [&95%={5.03949, 5.41521}]: 0.107017) [&95%={5.16247, 5.50959}]: 0.300881) [&95%={5.50008, 5.77118}]: 0.072431) [&95%={5.57619, 5.83716}]: 0.167815) [&95%={5.75354, 5.99095}]: 0.081972) [&95%={5.83167, 6.06958}]: 0.042540) [&95%={5.87206, 6.11202}]: 0.062347) [&95%={5.92989, 6.17311}]: 0.078551) [&95%={6.00378, 6.24975}]: 0.139362) [&95%={6.13722, 6.38753}]: 0.223545) [&95%={6.3508, 6.65822}]: 0.175845) [&95%={6.46515, 6.95354}]: 0.755450) [&95%={6.67082, 8.32921}];

END;
